# Supplementary material
Source: publisher figshare collection journal article supplement (https://gsajournals.figshare.com/ndownloader/files/17412923)
Supplement: Supplementary file 1 [file 17412923]

## Sheet: Sheet1
Table S7 Known drought tolerance related gene list
Gene Name	Annotation	Barley ortholog (IPK Gene ID)	Gene_Chr	Gene_Start	Gene_End	Exon_captured	Sequence_ID	Organism	9k_SNPs	SNP annotation	SNP_Chr	SNP_Physical_POS	Notes	Env_ass_fdr0.25	Variables	Env_ass_fdr0.1	Variables	FST_HE_97.5	FST_HL_97.5	FST_LL_97.5	FST_Lo_97.5	FST_La_97.5	FST_El_97.5	FST_Rnb_97.5	GH_97.5	FST_HE_99	FST_HL_99	FST_LL_99	FST_Lo_99	FST_La_99	FST_El_99	FST_Rnb_99	GH_99	Charicterized in Barley	Reference ID	Reference
AtABF3	Abscisic acid-insensitive 5-like protein 2	HORVU1Hr1G068760	chr1H	482059905	482063923	y	NM_179159.4	Arabidopsis thaliana	SCRI_RS_219726	nonsyn.	chr1H	482061321	Within gene	n	NA	n	NA	n	n	n	n	n	n	n	n	n	n	n	n	n	n	n	n	n	19947981	AREB1, AREB2, and ABF3 are master transcription factorsthat cooperatively regulate ABRE-dependent ABA signalinginvolved in drought stress tolerance and require ABA forfull activation
AtABF3	Abscisic acid-insensitive 5-like protein 2	HORVU1Hr1G068760	chr1H	482059905	482063923	y	NM_179159.4	Arabidopsis thaliana	SCRI_RS_4893	syn.	chr1H	482067288	3365bp upstrem of gene	n	NA	n	NA	n	y	n	n	n	n	n	n	n	n	n	n	n	n	n	n	n	19947981	AREB1, AREB2, and ABF3 are master transcription factorsthat cooperatively regulate ABRE-dependent ABA signalinginvolved in drought stress tolerance and require ABA forfull activation
AtABF3	Abscisic acid-insensitive 5-like protein 2	HORVU0Hr1G023640	chrUn	119245733	119249682	y	NM_179159.4	Arabidopsis thaliana	NA	NA	NA	NA	NA	n	NA	n	NA	n	n	n	n	n	n	n	n	n	n	n	n	n	n	n	n	n	19947981	AREB1, AREB2, and ABF3 are master transcription factorsthat cooperatively regulate ABRE-dependent ABA signalinginvolved in drought stress tolerance and require ABA forfull activation
AtACBP2	Acyl-CoA-binding domain-containing protein 1	HORVU2Hr1G122680.2	chr2H	753564097	753568405	y	NM_118916.3	Arabidopsis thaliana	12_31506	noncoding	chr2H	753567892	Within gene	n	NA	n	NA	n	n	y	n	y	n	n	n	n	n	n	n	n	n	n	n	n	22788984	Overexpression of Arabidopsis acyl-CoA-binding protein ACBP2 enhances drought tolerance.
AtADR1	Disease resistance protein (CC-NBS-LRR class) family	HORVU5Hr1G018350.2	chr5H	74312424	74316659	y	CAE46486.1	Arabidopsis thaliana	12_10923	syn.	chr5H	74312905	Within gene	n	NA	n	NA	n	n	n	n	n	n	n	n	n	n	n	n	n	n	n	n	n	15144382	Drought tolerance established by enhanced expression of the CC–NBS–LRR gene, ADR1, requires salicylic acid, EDS1 and ABI1
AtADR1	Disease resistance protein (CC-NBS-LRR class) family	HORVU5Hr1G018350.2	chr5H	74312424	74316659	y	CAE46486.1	Arabidopsis thaliana	11_21401	nonsyn.	chr5H	74314812	Within gene	n	NA	n	NA	n	n	n	n	n	n	n	n	n	n	n	n	n	n	n	n	n	15144382	Drought tolerance established by enhanced expression of the CC–NBS–LRR gene, ADR1, requires salicylic acid, EDS1 and ABI1
AtADR1	Disease resistance protein (CC-NBS-LRR class) family	HORVU5Hr1G018350.2	chr5H	74312424	74316659	y	CAE46486.1	Arabidopsis thaliana	SCRI_RS_159315	nonsyn.	chr5H	74316516	Within gene	n	NA	n	NA	n	n	n	n	n	n	n	n	n	n	n	n	n	n	n	n	n	15144382	Drought tolerance established by enhanced expression of the CC–NBS–LRR gene, ADR1, requires salicylic acid, EDS1 and ABI1
AtAPX2	Peroxidase superfamily protein	HORVU4Hr1G057210.1	chr4H	480951276	480954014	y	NM_111798.4	Arabidopsis thaliana	NA	NA	NA	NA	NA	n	NA	n	NA	n	n	n	n	n	n	n	n	n	n	n	n	n	n	n	n	n	17080642	A mutation affecting ASCORBATE PEROXIDASE 2 gene expression reveals a link between responses to high light and drought tolerance
AtAPX2	Peroxidase superfamily protein	HORVU4Hr1G057170.5	chr4H	480836359	480839097	y	NM_111798.4	Arabidopsis thaliana	11_10046	noncoding	chr4H	480839110	13bp upstream of gene	n	NA	n	NA	n	n	n	n	n	n	n	n	n	n	n	n	n	n	n	n	n	17080642	A mutation affecting ASCORBATE PEROXIDASE 2 gene expression reveals a link between responses to high light and drought tolerance
AtAREB1	Abscisic acid-insensitive 5-like protein 2	HORVU1Hr1G068760	chr1H	482059905	482063923	y	NM_001198228.1	Arabidopsis thaliana	SCRI_RS_219726	nonsyn.	chr1H	482061321	Within gene	n	NA	n	NA	n	n	n	n	n	n	n	n	n	n	n	n	n	n	n	n	n	19947981	AREB1, AREB2, and ABF3 are master transcription factorsthat cooperatively regulate ABRE-dependent ABA signalinginvolved in drought stress tolerance and require ABA forfull activation
AtAREB1	Abscisic acid-insensitive 5-like protein 2	HORVU1Hr1G068760	chr1H	482059905	482063923	y	NM_001198228.1	Arabidopsis thaliana	SCRI_RS_4893	syn.	chr1H	482067288	3365bp upstrem of gene	n	NA	n	NA	n	y	n	n	n	n	n	n	n	n	n	n	n	n	n	n	n	19947981	AREB1, AREB2, and ABF3 are master transcription factorsthat cooperatively regulate ABRE-dependent ABA signalinginvolved in drought stress tolerance and require ABA forfull activation
AtAREB1	Abscisic acid-insensitive 5-like protein 2	HORVU0Hr1G023640	chrUn	119245733	119249682	y	NM_001198228.1	Arabidopsis thaliana	NA	NA	NA	NA	NA	n	NA	n	NA	n	n	n	n	n	n	n	n	n	n	n	n	n	n	n	n	n	19947981	AREB1, AREB2, and ABF3 are master transcription factorsthat cooperatively regulate ABRE-dependent ABA signalinginvolved in drought stress tolerance and require ABA forfull activation
AtAREB2	bZIP transcription factor 27	HORVU5Hr1G068230	chr5H	516536712	516540135	y	NM_001203005.2	Arabidopsis thaliana	NA	NA	NA	NA	NA	n	NA	n	NA	n	n	n	n	n	n	n	n	n	n	n	n	n	n	n	n	n	19947981	AREB1, AREB2, and ABF3 are master transcription factorsthat cooperatively regulate ABRE-dependent ABA signalinginvolved in drought stress tolerance and require ABA forfull activation
AtAVP1	yrophosphate-energized vacuolar membrane proton pump	HORVU7Hr1G115540	chr7H	641783485	641789354	y	NM_101437.5	Arabidopsis thaliana	SCRI_RS_185445	nonsyn.	chr7H	641793105	3751bp upstrem of gene	n	NA	n	NA	n	n	n	n	n	n	n	n	n	n	n	n	n	n	n	n	n	20492547	Expression of an Arabidopsis vacuolar H+‐pyrophosphatase gene (AVP1) in cotton improves drought‐ and salt tolerance and increases fibre yield in the field conditions
AtAVP1	yrophosphate-energized vacuolar membrane proton pump	HORVU7Hr1G115540	chr7H	641783485	641789354	y	NM_101437.5	Arabidopsis thaliana	SCRI_RS_218891	syn.	chr4H	644836132	Within gene	n	NA	n	NA	n	n	n	n	n	n	n	n	n	n	n	n	n	n	n	n	n	20492547	Expression of an Arabidopsis vacuolar H+‐pyrophosphatase gene (AVP1) in cotton improves drought‐ and salt tolerance and increases fibre yield in the field conditions
AtAVP1	yrophosphate-energized vacuolar membrane proton pump	HORVU7Hr1G115540	chr7H	641783485	641789354	y	NM_101437.5	Arabidopsis thaliana	12_31325	noncoding	chr7H	641798036	8682bp upstream of gene	n	NA	n	NA	n	n	n	n	n	n	n	n	n	n	n	n	n	n	n	n	n	20492547	Expression of an Arabidopsis vacuolar H+‐pyrophosphatase gene (AVP1) in cotton improves drought‐ and salt tolerance and increases fibre yield in the field conditions
AtAVP1	yrophosphate-energized vacuolar membrane proton pump	HORVU7Hr1G115540	chr7H	641783485	641789354	y	NM_101437.5	Arabidopsis thaliana	11_10550	noncoding	chr7H	641788307	Within gene	n	NA	n	NA	n	n	n	n	n	n	n	n	n	n	n	n	n	n	n	n	n	20492547	Expression of an Arabidopsis vacuolar H+‐pyrophosphatase gene (AVP1) in cotton improves drought‐ and salt tolerance and increases fibre yield in the field conditions
AtCBF3/DREB1A	Ethylene-responsive element binding factor 14	HORVU5Hr1G080350	chr5H	560195524	560196810	y	NM_118680.2	Arabidopsis thaliana	NA	NA	NA	NA	NA	n	NA	n	NA	n	n	n	n	n	n	n	n	n	n	n	n	n	n	n	n	n	15047884	A Combination of the Arabidopsis DREB1A Gene and Stress-Inducible rd29A Promoter Improved Drought- and Low-Temperature Stress Tolerance in Tobacco by Gene Transfer
AtCBF4	Ethylene-responsive element binding factor 14	HORVU5Hr1G080350	chr5H	560195524	560196810	y	NM_124578.2	Arabidopsis thaliana	NA	NA	NA	NA	NA	n	NA	n	NA	n	n	n	n	n	n	n	n	n	n	n	n	n	n	n	n	n	12376631	Transcription Factor CBF4 Is a Regulator of Drought Adaptation in Arabidopsis
AtCBL1	calcineurin B-like protein 1	HORVU4Hr1G090270	chr4H	644832787	644837545	y	NM_117870	Arabidopsis thaliana	SCRI_RS_119390	noncoding	chr4H	644846209	8664bp upstream of gene	n	NA	n	NA	n	n	n	n	n	n	n	n	n	n	n	n	n	n	n	n	n	12897256	CBL1, a Calcium Sensor That Differentially Regulates Salt, Drought, and Cold Responses in Arabidopsis
AtCBL1	calcineurin B-like protein 1	HORVU4Hr1G090270	chr4H	644832787	644837545	y	NM_117870	Arabidopsis thaliana	SCRI_RS_142177	syn.	chr4H	644838667	Within gene	n	NA	n	NA	n	n	n	n	n	n	n	n	n	n	n	n	n	n	n	n	n	12897256	CBL1, a Calcium Sensor That Differentially Regulates Salt, Drought, and Cold Responses in Arabidopsis
AtCesA8/IRX1	ellulose synthase family protein	HORVU3Hr1G071770	chr3H	542640163	542645660	y	NM_117994.4	Arabidopsis thaliana	SCRI_RS_225522	syn.	chr3H	542642217	Within gene	n	NA	n	NA	n	n	n	n	n	n	n	n	n	n	n	n	n	n	n	n	n	15998313	Disruption of the cellulose synthase gene, AtCesA8/IRX1, enhances drought and osmotic stress tolerance in Arabidopsis
AtCPK23	calcium-dependent protein kinase 33	HORVU2Hr1G046660	chr2H	252048307	252106831	y	NM_001203743.2	Arabidopsis thaliana	12_30042	noncoding	chr2H	252052546	Within gene	n	NA	n	NA	n	n	n	n	n	n	n	n	n	n	n	n	n	n	n	n	n	17541706	AtCPK23 functions in Arabidopsis responses to drought and salt stresses
AtCPK6	Calcium-dependent protein kinase family protein	HORVU6Hr1G066470	chr6H	460161859	460166982	y	NM_127284.3	Arabidopsis thaliana	NA	NA	NA	NA	NA	n	NA	n	NA	n	n	n	n	n	n	n	n	n	n	n	n	n	n	n	n	n	20217124	AtCPK6, a functionally redundant and positive regulator involved in salt/drought stress tolerance in Arabidopsis
AtEDT1/HDG11	Homeobox-leucine zipper protein family	HORVU6Hr1G079410	chr6H	537722747	537727179	y	NM_105996.4	Arabidopsis thaliana	NA	NA	NA	NA	NA	n	NA	n	NA	n	n	n	n	n	n	n	n	n	n	n	n	n	n	n	n	n	23735506	Arabidopsis EDT1/HDG11 Confers Drought Tolerance in Transgenic Rice Without Yield Penalty
AtERECTA	receptor-like protein kinase 2	HORVU7Hr1G034430	chr7H	71991114	71998859	y	NM_128190.3	Arabidopsis thaliana	SCRI_RS_200890	syn.	chr7H	71998509	Within gene	n	NA	n	NA	n	y	n	n	n	n	n	n	n	n	n	n	n	n	n	n	n	20200073	The ERECTA gene regulates plant transpiration efficiency in Arabidopsis
AtGTL1	Trihelix transcription factor GT-2	HORVU1Hr1G046940	chr1H	345350613	345355483	y	NM_103052	Arabidopsis thaliana	SCRI_RS_155439	noncoding	chr1H	345351439	Within gene	n	NA	n	NA	n	n	n	n	n	n	n	n	n	n	n	n	n	n	n	n	n	21169508	The Arabidopsis GTL1 Transcription Factor Regulates Water Use Efficiency and Drought Tolerance by Modulating Stomatal Density via Transrepression of SDD1
AtHahb-4	Homeobox-leucine zipper protein family	HORVU5Hr1G081090	chr5H	563292024	563294199	y	AAA63768.2	Helianthus annuus	NA	NA	NA	NA	NA	n	NA	n	NA	n	n	n	n	n	n	n	n	n	n	n	n	n	n	n	n	n	16201409	Hahb-4, a sunflower homeobox-leucine zipper gene, is a developmentalregulator and confers drought tolerance to Arabidopsis thaliana plants.
AtHARDY	Ethylene-responsive transcription factor 1	HORVU0Hr1G030500	chrUn	177249569	177250297	y	NM_129202.1	Arabidopsis thaliana	NA	NA	NA	NA	NA	n	NA	n	NA	n	n	n	n	n	n	n	n	n	n	n	n	n	n	n	n	n	17881564	Improvement of water use efficiency in rice by expression of HARDY, an Arabidopsis drought and salt tolerance gene
AtHARDY	Ethylene-responsive transcription factor 1	HORVU0Hr1G018240	chrUn	94553594	94554322	y	NM_129202.1	Arabidopsis thaliana	NA	NA	NA	NA	NA	n	NA	n	NA	n	n	n	n	n	n	n	n	n	n	n	n	n	n	n	n	n	17881564	Improvement of water use efficiency in rice by expression of HARDY, an Arabidopsis drought and salt tolerance gene
AtHDG11	Homeobox-leucine zipper protein family	HORVU6Hr1G079410	chr6H	537722747	537727179	y	NM_105996	Arabidopsis thaliana	NA	NA	NA	NA	NA	n	NA	n	NA	n	n	n	n	n	n	n	n	n	n	n	n	n	n	n	n	n	18451323	Activated Expression of an Arabidopsis HD-START Protein Confers Drought Tolerance with Improved Root System and Reduced Stomatal Density
AtIRX14	Galactosylgalactosylxylosylprotein 3-beta-glucuronosyltransferase	HORVU7Hr1G100490	chr7H	605134968	605138916	y	NM_119853.4	Arabidopsis thaliana	12_20684	noncoding	chr7H	605135349	Within gene	n	NA	n	NA	n	n	n	n	n	n	n	y	n	n	n	n	n	n	n	n	n	20595206	IRX14 and IRX14-LIKE, Two Glycosyl Transferases Involved in Glucuronoxylan Biosynthesis and Drought Tolerance in Arabidopsis
AtIRX14L	Length less than 100bp	NA	NA	NA	NA	NA	NM_126123.5	Arabidopsis thaliana	NA	NA	NA	NA	NA	n	NA	n	NA	n	n	n	n	n	n	n	n	n	n	n	n	n	n	n	n	n	20595206	IRX14 and IRX14-LIKE, Two Glycosyl Transferases Involved in Glucuronoxylan Biosynthesis and Drought Tolerance in Arabidopsis
AtLOS5	Molybdenum cofactor sulfurase	HORVU7Hr1G107590	chr7H	623432622	623438617	y	NM_101519.3	Arabidopsis thaliana	11_11243	noncoding	chr7H	623438216	Within gene	n	NA	n	NA	n	n	n	n	n	n	n	n	n	n	n	n	n	n	n	n	n	22412184	Overexpression of the AtLOS5 gene increased abscisic acid level and drought tolerance in transgenic cotton
AtLTI45	Length less than 100bp	NA	NA	NA	NA	NA	NM_180616.3	Arabidopsis thaliana	NA	NA	NA	NA	NA	n	NA	n	NA	n	n	n	n	n	n	n	n	n	n	n	n	n	n	n	n	n	7948863	Characterization and differential expression of dhn/lea/rab-like genes during cold acclimation and drought stress in Arabidopsis thaliana
AtMYB15	MYB-like 102	HORVU6Hr1G058640	chr6H	384040684	384042122	y	NM_113226.5	Arabidopsis thaliana	NA	NA	NA	NA	NA	n	NA	n	NA	n	n	n	n	n	n	n	n	n	n	n	n	n	n	n	n	n	19161942	Transgenic expression of MYB15 confers enhanced sensitivity to abscisic acid and improved drought tolerance in Arabidopsis thaliana
AtMYB2	myb domain protein 108	HORVU1Hr1G016420	chr1H	52186799	52188501	y	AAR24727.1	Arabidopsis thaliana	NA	NA	NA	NA	NA	n	NA	n	NA	n	n	n	n	n	n	n	n	n	n	n	n	n	n	n	n	n	9368419	Role of arabidopsis MYC and MYB homologs in drought- and abscisic acid-regulated gene expression
AtMYB60	Myb domain protein 30	HORVU5Hr1G123880	chr5H	664849928	664851619	y	NM_100755.3	Arabidopsis thaliana	SCRI_RS_146241	nonsyn.	chr5H	664850192	Within gene	n	NA	n	NA	n	n	n	n	n	n	n	n	n	n	n	n	n	n	n	n	n	16005291	A Guard-Cell-Specific MYB Transcription Factor Regulates Stomatal Movements and Plant Drought Tolerance
AtMYC	Length less than 100bp	NA	NA	NA	NA	NA	NM_105042.5	Arabidopsis thaliana	NA	NA	NA	NA	NA	n	NA	n	NA	n	n	n	n	n	n	n	n	n	n	n	n	n	n	n	n	n	9368419	Role of arabidopsis MYC and MYB homologs in drought- and abscisic acid-regulated gene expression
AtNCED3	nine-cis-epoxycarotenoid dioxygenase 3	HORVU5Hr1G008050.1	chr5H	18037869	18039692	y	NM_112304.3	Arabidopsis thaliana	NA	NA	NA	NA	NA	n	NA	n	NA	n	n	n	n	n	n	n	n	n	n	n	n	n	n	n	n	n	22930734	Regulation of drought tolerance by gene manipulation of 9‐cis‐epoxycarotenoid dioxygenase, a key enzyme in abscisic acid biosynthesis in Arabidopsis
AtP5CR	Pyrroline-5-carboxylate reductase	HORVU3Hr1G106720	chr3H	671275660	671278089	y	NM_121484.5	Arabidopsis thaliana	NA	NA	NA	NA	NA	n	NA	n	NA	n	n	n	n	n	n	n	n	n	n	n	n	n	n	n	n	n	15602813	Photosynthetic response of transgenic soybean plants, containing an Arabidopsis P5CR gene, during heat and drought stress
AtRD22	Length less than 100bp	NA	NA	NA	NA	NA	NM_122472.4	Arabidopsis thaliana	NA	NA	NA	NA	NA	n	NA	n	NA	n	n	n	n	n	n	n	n	n	n	n	n	n	n	n	n	n	25333723	AtRD22 and AtUSPL1, Members of the Plant-Specific BURP Domain Family Involved in Arabidopsis thaliana Drought Tolerance
AtSAL1	3'(2'),5'-bisphosphate nucleotidase	HORVU5Hr1G034810	chr5H	236571700	236583161	y	NM_125794.5	Arabidopsis thaliana	NA	NA	NA	NA	NA	n	NA	n	NA	n	n	n	n	n	n	n	n	n	n	n	n	n	n	n	n	n	19170934	The nucleotidase/phosphatase SAL1 is a negative regulator of drought tolerance in Arabidopsis
AtSDIR1	Length less than 100bp	NA	NA	NA	NA	NA	NM_115410.3	Arabidopsis thaliana	NA	NA	NA	NA	NA	n	NA	n	NA	n	n	n	n	n	n	n	n	n	n	n	n	n	n	n	n	n	24080398	Arabidopsis SDIR1 Enhances Drought Tolerance in Crop Plants
AtSIZ1	E3 SUMO-protein ligase SIZ1	HORVU1Hr1G013600	chr1H	36438877	36459275	y	NM_203240.3	Arabidopsis thaliana	SCRI_RS_11615	noncoding	chr1H	36439607	Within gene	n	NA	n	NA	n	n	n	n	n	n	n	n	n	n	n	n	n	n	n	n	n	https://doi.org/10.1111/tpj.12014	SIZ1 deficiency causes reduced stomatal aperture andenhanced drought tolerance via controlling salicylicacid-induced accumulation of reactive oxygen species inArabidopsis
AtSIZ1	E3 SUMO-protein ligase SIZ1	HORVU1Hr1G013600	chr1H	36438877	36459275	y	NM_203240.3	Arabidopsis thaliana	SCRI_RS_189637	syn.	chr1H	36457833	Within gene	n	NA	n	NA	n	n	n	n	n	n	n	n	n	n	n	n	n	n	n	n	n	https://doi.org/10.1111/tpj.12014	SIZ1 deficiency causes reduced stomatal aperture andenhanced drought tolerance via controlling salicylicacid-induced accumulation of reactive oxygen species inArabidopsis
AtSIZ1	E3 SUMO-protein ligase SIZ1	HORVU1Hr1G013600	chr1H	36438877	36459275	y	NM_203240.3	Arabidopsis thaliana	SCRI_RS_205816	noncoding	chr1H	36460442	1167bp upstream of gene	n	NA	n	NA	n	n	n	n	n	n	n	n	n	n	n	n	n	n	n	n	n	https://doi.org/10.1111/tpj.12014	SIZ1 deficiency causes reduced stomatal aperture andenhanced drought tolerance via controlling salicylicacid-induced accumulation of reactive oxygen species inArabidopsis
AtSRK2C	Protein kinase superfamily protein	HORVU2Hr1G075470	chr2H	543955717	543960490	y	NM_120946.5	Arabidopsis thaliana	NA	NA	NA	NA	NA	n	NA	n	NA	n	n	n	n	n	n	n	n	n	n	n	n	n	n	n	n	n	15561775	SRK2C, a SNF1-related protein kinase 2, improves drought tolerance by controlling stress-responsive gene expression in Arabidopsis thaliana
AtTOC1	Length less than 100bp	NA	NA	NA	NA	NA	NM_125531.4	Arabidopsis thaliana	NA	NA	NA	NA	NA	n	NA	n	NA	n	n	n	n	n	n	n	n	n	n	n	n	n	n	n	n	n	19816401	TOC1 functions as a molecular switch connecting the circadian clock with plant responses to drought
AtUSPL1	Length less than 100bp	NA	NA	NA	NA	NA	AAP21236.1	Arabidopsis thaliana	NA	NA	NA	NA	NA	n	NA	n	NA	n	n	n	n	n	n	n	n	n	n	n	n	n	n	n	n	n	25333723	AtRD22 and AtUSPL1, Members of the Plant-Specific BURP Domain Family Involved in Arabidopsis thaliana Drought Tolerance
AtWNK9	Protein farnesyltransferase subunit beta	HORVU3Hr1G070050	chr3H	530325159	530329231	y	NM_123392.2	Arabidopsis thaliana	SCRI_RS_204491	nonsyn.	chr3H	530329100	Within gene	n	NA	n	NA	n	n	n	y	n	n	n	n	n	n	n	n	n	n	n	n	n	24561249	AtWNK9 is regulated by ABA and dehydration and is involved in drought tolerance in Arabidopsis
AtWNK9	Protein farnesyltransferase subunit beta	HORVU3Hr1G070050	chr3H	530325159	530329231	y	NM_123392.2	Arabidopsis thaliana	SCRI_RS_200508	syn.	chr3H	530323891	1269bp downstream of gene	n	NA	n	NA	n	n	n	n	n	n	n	n	n	n	n	n	n	n	n	n	n	24561249	AtWNK9 is regulated by ABA and dehydration and is involved in drought tolerance in Arabidopsis
AtWNK9	Protein farnesyltransferase subunit beta	HORVU3Hr1G070050	chr3H	530325159	530329231	y	NM_123392.2	Arabidopsis thaliana	12_31242	noncoding	chr3H	530321562	3598bp downstream of gene	n	NA	n	NA	n	n	n	n	n	n	n	n	n	n	n	n	n	n	n	n	n	24561249	AtWNK9 is regulated by ABA and dehydration and is involved in drought tolerance in Arabidopsis
AtWRKY57	WRKY DNA-binding protein 57	HORVU5Hr1G096420	chr5H	601272072	601274219	y	NM_105598.3	Arabidopsis thaliana	SCRI_RS_13320	noncoding	chr5H	601271063	1010bp downstream of gene	n	NA	n	NA	n	n	n	n	n	n	n	n	n	n	n	n	n	n	n	n	n	22930734	Activated Expression of WRKY57 Confers Drought Tolerance in Arabidopsis
AtWRKY63	Length less than 100bp	NA	NA	NA	NA	NA	NM_105331.4	Arabidopsis thaliana	NA	NA	NA	NA	NA	n	NA	n	NA	n	n	n	n	n	n	n	n	n	n	n	n	n	n	n	n	n	20487379	ABO3, a WRKY transcription factor, mediates plant responses to abscisic acid and drought tolerance in Arabidopsis
AtWXP2	Length less than 100bp	NA	NA	NA	NA	NA	Medtr3g074130.1	Medicago truncatula	NA	NA	NA	NA	NA	n	NA	n	NA	n	n	n	n	n	n	n	n	n	n	n	n	n	n	n	n	n	17347795	Heterologous expression of two Medicago truncatula putative ERF transcription factor genes, WXP1 and WXP2, in Arabidopsis led to increased leaf wax accumulation and improved drought tolerance, but differential response in freezing tolerance
BrERF4	Ethylene-responsive transcription factor 4	HORVU7Hr1G099670	chr7H	601923021	601924286	y	NM_112384.2	Brassica napus	SCRI_RS_152402	nonsyn.	chr7H	601923649	Within gene	n	NA	n	NA	n	n	n	n	n	n	n	y	n	n	n	n	n	n	n	n	n	20803085	Overexpression of the ethylene-responsive factor gene BrERF4 from Brassica rapa increases tolerance to salt and drought in Arabidopsis plants
GmLEA-D11	less than 100 bp match	NA	NA	NA	NA	NA	AM421515.1	Glycine max	NA	NA	NA	NA	NA	n	NA	n	NA	n	n	n	n	n	n	n	n	n	n	n	n	n	n	n	n	n	10.4236/ajmb.2013.31004	Identification and characterization drought tolerance of gene LEA-D11 soybean (glycine max L. Merr) based on PCR-sequencing
GsZFP1	less than 100 bp match	NA	NA	NA	NA	NA	AT2g15740	Glyycine soja	NA	NA	NA	NA	NA	n	NA	n	NA	n	n	n	n	n	n	n	n	n	n	n	n	n	n	n	n	n	23867600	Overexpression of GsZFP1 enhances salt and drought tolerance in transgenic alfalfa (Medicago sativa L.)
HvCBF3	C-repeat-binding factor 4	HORVU5Hr1G080420	chr5H	560569796	560571193	y	MLOC_4956.1	Hordeum vulgare subsp. vulgare	12_30848	syn.	chr5H	560570414	Within gene	n	NA	n	NA	n	n	n	n	n	n	n	n	n	n	n	n	n	n	n	n	y	https://doi.org/10.1080/15427528.2014.976802	Physiological and Molecular Responses to Controlled Severe Drought in Two Barley (Hordeum vulgare subsp. vulgare L.) Genotypes
HvCBF3	C-repeat-binding factor 4	HORVU5Hr1G080420	chr5H	560569796	560571193	y	MLOC_4956.1	Hordeum vulgare subsp. vulgare	BK_21	syn.	chr5H	560570765	Within gene	n	NA	n	NA	n	n	n	n	n	n	n	n	n	n	n	n	n	n	n	n	y	https://doi.org/10.1080/15427528.2014.976802	Physiological and Molecular Responses to Controlled Severe Drought in Two Barley (Hordeum vulgare subsp. vulgare L.) Genotypes
HvDhn1	Dehydrin DHN7	HORVU5Hr1G092160	chr5H	587675926	587676642	n	AF043087	Hordeum vulgare subsp. vulgare	NA	NA	NA	NA	NA	n	NA	n	NA	n	n	n	n	n	n	n	n	n	n	n	n	n	n	n	n	y	https://doi.org/10.1111/j.1365-3040.2004.01237.x	Differential expression of dehydrin genes in wild barley,Hordeum spontaneum, associated with resistance to water deficit
HvDhn1	Dehydrin DHN7	HORVU5Hr1G092120	chr5H	587612623	587613339	n	AF043087	Hordeum vulgare subsp. vulgare	NA	NA	NA	NA	NA	n	NA	n	NA	n	n	n	n	n	n	n	n	n	n	n	n	n	n	n	n	y	https://doi.org/10.1007/s001220051189	The barley (Hordeum vulgare subsp. vulgare L.) dehydrin multigene family: sequences, allele types, chromosome assignments, and expression characteristics of 11 Dhn genes of cv Dicktoo
HvDhn2	Dehydrin	HORVU5Hr1G092100	chr5H	587585373	587586182	y	AF181452	Hordeum vulgare subsp. vulgare	NA	NA	NA	NA	NA	n	NA	n	NA	n	n	n	n	n	n	n	n	n	n	n	n	n	n	n	n	y	https://doi.org/10.1007/s001220051189	The barley (Hordeum vulgare subsp. vulgare L.) dehydrin multigene family: sequences, allele types, chromosome assignments, and expression characteristics of 11 Dhn genes of cv Dicktoo
HvDhn2	Dehydrin	HORVU5Hr1G092150	chr5H	587648995	587649519	y	AF181452	Hordeum vulgare subsp. vulgare	NA	NA	NA	NA	NA	n	NA	n	NA	n	n	n	n	n	n	n	n	n	n	n	n	n	n	n	n	y	https://doi.org/10.1007/s001220051189	The barley (Hordeum vulgare subsp. vulgare L.) dehydrin multigene family: sequences, allele types, chromosome assignments, and expression characteristics of 11 Dhn genes of cv Dicktoo
HvDhn3	Dehydrin DHN3	HORVU6Hr1G084070	chr6H	553220440	553221413	y	AF181453	Hordeum vulgare subsp. vulgare	NA	NA	NA	NA	NA	n	NA	n	NA	n	n	n	n	n	n	n	n	n	n	n	n	n	n	n	n	y	https://doi.org/10.1007/s001220051189	The barley (Hordeum vulgare subsp. vulgare L.) dehydrin multigene family: sequences, allele types, chromosome assignments, and expression characteristics of 11 Dhn genes of cv Dicktoo
HvDhn4	Dehydrin DHN4	HORVU6Hr1G083980	chr6H	553165574	553166757	y	AF181454	Hordeum vulgare subsp. vulgare	NA	NA	NA	NA	NA	n	NA	n	NA	n	n	n	n	n	n	n	n	n	n	n	n	n	n	n	n	y	https://doi.org/10.1007/s001220051189	The barley (Hordeum vulgare subsp. vulgare L.) dehydrin multigene family: sequences, allele types, chromosome assignments, and expression characteristics of 11 Dhn genes of cv Dicktoo
HvDhn5	Dehydrin	HORVU6Hr1G083960	chr6H	553017398	553138858	n	AF043096	Hordeum vulgare subsp. vulgare	NA	NA	NA	NA	NA	n	NA	n	NA	n	n	n	n	n	n	n	n	n	n	n	n	n	n	n	n	y	https://doi.org/10.1111/j.1365-3040.2004.01237.x	Differential expression of dehydrin genes in wild barley,Hordeum spontaneum, associated with resistance to water deficit
HvDhn6	Dehydrin DHN6	HORVU4Hr1G010750	chr4H	32441723	32442525	n	AF181456	Hordeum vulgare subsp. vulgare	NA	NA	NA	NA	NA	n	NA	n	NA	n	n	n	n	n	n	n	n	n	n	n	n	n	n	n	n	y	https://doi.org/10.1007/s001220051189	The barley (Hordeum vulgare subsp. vulgare L.) dehydrin multigene family: sequences, allele types, chromosome assignments, and expression characteristics of 11 Dhn genes of cv Dicktoo
HvDhn7	Dehydrin DHN7	HORVU6Hr1G084010	chr6H	553202848	553204093	n	AF181457	Hordeum vulgare subsp. vulgare	12_31044	noncoding	chr6H	553204175	82bp upstream of gene	n	NA	n	NA	n	n	n	n	n	n	n	n	n	n	n	n	n	n	n	n	y	https://doi.org/10.1007/s001220051189	The barley (Hordeum vulgare subsp. vulgare L.) dehydrin multigene family: sequences, allele types, chromosome assignments, and expression characteristics of 11 Dhn genes of cv Dicktoo
HvDhn7	Dehydrin DHN7	HORVU6Hr1G084010	chr6H	553202848	553204093	n	AF181457	Hordeum vulgare subsp. vulgare	12_31048	noncoding	chr6H	553203851	Within gene	n	NA	n	NA	n	n	n	n	n	n	n	n	n	n	n	n	n	n	n	n	y	https://doi.org/10.1007/s001220051189	The barley (Hordeum vulgare subsp. vulgare L.) dehydrin multigene family: sequences, allele types, chromosome assignments, and expression characteristics of 11 Dhn genes of cv Dicktoo
HvDhn7	Dehydrin DHN7	HORVU6Hr1G084010	chr6H	553202848	553204093	n	AF181457	Hordeum vulgare subsp. vulgare	SCRI_RS_158871	noncoding	chr6H	553211304	Within gene	n	NA	n	NA	n	n	n	n	n	n	n	n	n	n	n	n	n	n	n	n	y	https://doi.org/10.1007/s001220051189	The barley (Hordeum vulgare subsp. vulgare L.) dehydrin multigene family: sequences, allele types, chromosome assignments, and expression characteristics of 11 Dhn genes of cv Dicktoo
HvDhn9	Dehydrin Rab15	HORVU5Hr1G103460	chr5H	616115076	616116086	y	AF181459	Hordeum vulgare subsp. vulgare	BK_04	syn.	chr5H	616115199	Within gene	n	NA	n	NA	n	n	n	n	n	n	n	n	n	n	n	n	n	n	n	n	y	https://doi.org/10.1007/s001220051189	The barley (Hordeum vulgare subsp. vulgare L.) dehydrin multigene family: sequences, allele types, chromosome assignments, and expression characteristics of 11 Dhn genes of cv Dicktoo
HvDhn9	Dehydrin Rab15	HORVU5Hr1G103460	chr5H	616115076	616116086	y	AF181459	Hordeum vulgare subsp. vulgare	12_31050	syn.	chr5H	616115199	Within gene	n	NA	n	NA	n	n	n	n	n	n	n	n	n	n	n	n	n	n	n	n	y	https://doi.org/10.1007/s001220051189	The barley (Hordeum vulgare subsp. vulgare L.) dehydrin multigene family: sequences, allele types, chromosome assignments, and expression characteristics of 11 Dhn genes of cv Dicktoo
HvDME	DNA glycosylase superfamily protein	HORVU1Hr1G073540	chr1H	503657570	503662934	y	Os01g11900.1	Hordeum vulgare subsp. vulgare	SCRI_RS_182326	nonsyn.	chr1H	503658565	Within gene	n	NA	n	NA	n	n	n	n	n	n	n	n	n	n	n	n	n	n	n	n	y	24175960	The study of a barley epigenetic regulator, HvDME,in seed development and under drought
HvHsdr4	Ganglioside-induced differentiation-associated protein 2	HORVU3Hr1G106730	chr3H	671278537	671280765	y	DQ464370	Hordeum vulgare subsp. vulgare	NA	NA	NA	NA	NA	n	NA	n	NA	n	n	n	n	n	n	n	n	n	n	n	n	n	n	n	n	y	17238046	Identification of a novel gene (Hsdr4) involved in water-stress tolerance in wild barley
HvHVA1	Late embryogenesis abundant protein 76	HORVU1Hr1G079290	chr1H	522615372	522616624	y	X78205.1	Hordeum vulgare subsp. vulgare	NA	NA	NA	NA	NA	n	NA	n	NA	n	n	n	n	n	n	n	n	n	n	n	n	n	n	n	n	y	10.4172/2329-8863.1000105	Barley HVA1 Gene Confers Drought and Salt Tolerance in Transgenic Maize (Zea Mays L.)
HvNCED2	nine-cis-epoxycarotenoid dioxygenase 9	HORVU5Hr1G092850	chr5H	589662436	589664852	y	AB239298.1	Hordeum vulgare subsp. vulgare	NA	NA	NA	NA	NA	n	NA	n	NA	n	n	n	n	n	n	n	n	n	n	n	n	n	n	n	n	y	https://doi.org/10.1080/15427528.2014.976802	Physiological and Molecular Responses to Controlled Severe Drought in Two Barley (Hordeum vulgare subsp. vulgare L.) Genotypes
HvP5CS1	Gamma-glutamyl phosohate reductase	HORVU1Hr1G072780	chr1H	498975382	498982941	y	AY888045	Hordeum vulgare subsp. vulgare	11_20550	noncoding	chr1H	498975662	Within gene	n	NA	n	NA	n	n	n	n	n	n	n	n	n	n	n	n	n	n	n	n	y	12228549	Overexpression of [delta]-Pyrroline-5-Carboxylate Synthetase Increases Proline Production and Confers Osmotolerance in Transgenic Plants.
HvSNAC1	NAC domain protein	HORVU5Hr1G111590	chr5H	636772274	636774317	y	DQ394702	Hordeum vulgare subsp. vulgare	12_10273	noncoding	chr5H	636773845	Within gene	n	NA	n	NA	n	n	n	n	n	n	n	n	n	n	n	n	n	n	n	n	y	10.1007/s11032-013-9958-1	Overexpression of the transcription factor HvSNAC1 improves drought tolerance in barley (Hordeum vulgare subsp. vulgare L.)
HvWRKY38	WRKY family transcription factor	HORVU6Hr1G028790	chr6H	115444384	115446574	y	AY541586	Hordeum vulgare subsp. vulgare	12_30473	syn.	chr6H	115445291	Within gene	n	NA	n	NA	n	n	n	n	n	n	n	n	n	n	n	n	n	n	n	n	y	10.1007/s11032-009-9341-4)	Constitutive expression of the barley HvWRKY38 transcription factor enhances drought tolerance in turf and forage grass (Paspalum notatum Flugge)
NtHSP70-1	AD-specific glutamate dehydrogenase	HORVU1Hr1G072210	chr1H	496657261	496660675	y	AY372069	Nicotiana tabacum	SCRI_RS_219726	nonsyn.	chr1H	482061321	Within gene	n	NA	n	NA	n	n	n	n	n	n	n	n	n	n	n	n	n	n	n	n	n	16365678	Over-expression of tobacco NtHSP70-1 contributes to drought-stress tolerance in plants
OsbHLH148	bZIP transcription factor 27	HORVU6Hr1G080670	chr6H	542474737	542479719	y	BAG92808.1	Oryza sativa	SCRI_RS_149401	syn.	chr6H	542476577	Within gene	n	NA	n	NA	n	n	n	n	n	n	n	n	n	n	n	n	n	n	n	n	n	21332845	OsbHLH148, a basic helix‐loop‐helix protein, interacts with OsJAZ proteins in a jasmonate signaling pathway leading to drought tolerance in rice
OsbHLH148	bZIP transcription factor 27	HORVU6Hr1G080670	chr6H	542474737	542479719	y	BAG92808.1	Oryza sativa	SCRI_RS_169374	noncoding	chr6H	542482959	3240bp upstrem from the gene	n	NA	n	NA	n	n	n	n	n	n	n	n	n	n	n	n	n	n	n	n	n	21332845	OsbHLH148, a basic helix‐loop‐helix protein, interacts with OsJAZ proteins in a jasmonate signaling pathway leading to drought tolerance in rice
OsbZIP23	bZIP transcription factor 27	HORVU6Hr1G080670	chr6H	542474737	542479719	y	AK072062.1	Oryza sativa	SCRI_RS_149401	syn.	chr6H	542476577	Within gene	n	NA	n	NA	n	n	n	n	n	n	n	n	n	n	n	n	n	n	n	n	n	https://doi.org/10.1104	Open Access Characterization of OsbZIP23 as a Key Player of the Basic Leucine Zipper Transcription Factor Family for Conferring Abscisic Acid Sensitivity and Salinity and Drought Tolerance in Rice
OsbZIP23	bZIP transcription factor 27	HORVU6Hr1G080670	chr6H	542474737	542479719	y	AK072062.1	Oryza sativa	SCRI_RS_169374	noncoding	chr6H	542482959	3240bp upstrem from the gene	n	NA	n	NA	n	n	n	n	n	n	n	n	n	n	n	n	n	n	n	n	n	https://doi.org/10.1104	Open Access Characterization of OsbZIP23 as a Key Player of the Basic Leucine Zipper Transcription Factor Family for Conferring Abscisic Acid Sensitivity and Salinity and Drought Tolerance in Rice
OsbZIP46	bZIP transcription factor 27	HORVU7Hr1G035500	chr7H	78901242	78906724	y	AK103188.1	Oryza sativa	NA	NA	NA	NA	NA	n	NA	n	NA	n	n	n	n	n	n	n	n	n	n	n	n	n	n	n	n	n	22301130	Constitutive Activation of Transcription Factor OsbZIP46 Improves Drought Tolerance in Rice
OsbZIP71	BZIP transcription factor	HORVU5Hr1G054510	chr5H	428601707	428605295	y	LOC_Os09g13570.1	Oryza sativa	NA	NA	NA	NA	NA	n	NA	n	NA	n	n	n	n	n	n	n	n	n	n	n	n	n	n	n	n	n	29946804	OsbZIP71, a bZIP transcription factor, confers salinity and drought tolerance in rice
OsbZIP72	bZIP transcription factor 27	HORVU5Hr1G068230	chr5H	516536712	516540135	y	LOC_Os09g28310.1	Oryza sativa	NA	NA	NA	NA	NA	n	NA	n	NA	n	n	n	n	n	n	n	n	n	n	n	n	n	n	n	n	n	19048288	Identification of OsbZIP72 as a positive regulator of ABA response and drought tolerance in rice
OsCDPK7	Pentatricopeptide repeat-containing protein	HORVU2Hr1G104660	chr2H	704362280	704375788	y	LOC_Os04g49510.1	Oryza sativa	12_20989	noncoding	chr2H	704374615	Within gene	n	NA	n	NA	n	n	n	n	n	n	n	n	n	n	n	n	n	n	n	n	n	10929125	Over-expression of a single Ca2+-dependent protein kinase confers both cold and salt/drought tolerance on rice plants.
OsCDPK7	Pentatricopeptide repeat-containing protein	HORVU2Hr1G104660	chr2H	704362280	704375788	y	LOC_Os04g49510.1	Oryza sativa	SCRI_RS_222093	noncoding	chr2H	704370360	Within gene	n	NA	n	NA	n	n	n	n	n	n	n	n	n	n	n	n	n	n	n	n	n	10929125	Over-expression of a single Ca2+-dependent protein kinase confers both cold and salt/drought tolerance on rice plants.
OsCDPK7	Pentatricopeptide repeat-containing protein	HORVU2Hr1G104660	chr2H	704362280	704375788	y	LOC_Os04g49510.1	Oryza sativa	11_10429	noncoding	chr2H	704365852	Within gene	n	NA	n	NA	n	n	n	n	n	n	n	n	n	n	n	n	n	n	n	n	n	10929125	Over-expression of a single Ca2+-dependent protein kinase confers both cold and salt/drought tolerance on rice plants.
OsDHODH1	Dihydroorotate dehydrogenase (quinone)	HORVU6Hr1G074200	chr6H	513099539	513104669	y	LOC_Os02g50350.1	Oryza sativa	12_31088	syn.	chr6H	513101328	Within gene	n	NA	n	NA	n	n	n	n	n	n	y	n	n	n	n	n	n	n	n	n	n	19723241	The OsDHODH1 Gene is Involved in Salt and Drought Tolerance in Rice
OsDIL	Lipid binding protein	HORVU1Hr1G043430	chr1H	315507548	315508480	n	LOC_Os10g05720.1	Oryza sativa	12_30562	noncoding	chr1H	315508260	Within gene	n	NA	n	NA	n	n	n	n	n	n	n	n	n	n	n	n	n	n	n	n	n	23686450	The rice OsDIL gene plays a role in drought tolerance at vegetative and reproductive stages
OsDREB1G	Ethylene-responsive transcription factor 4	HORVU0Hr1G016540	chrUn	89030447	89031106	n	AK106041.1	Oryza sativa	12_11321	syn.	chrUn	89030956	Within gene	n	NA	n	NA	n	n	n	n	n	n	n	n	n	n	n	n	n	n	n	n	n	18779927	Over-expression of OsDREB genes lead to enhanced drought tolerance in rice.
OsDREB2B	Ethylene-responsive transcription factor 4	HORVU1Hr1G060490	chr1H	439177246	439179945	y	AK099221.1	Oryza sativa	NA	NA	NA	NA	NA	n	NA	n	NA	n	n	n	n	n	n	n	n	n	n	n	n	n	n	n	n	n	18779927	Over-expression of OsDREB genes lead to enhanced drought tolerance in rice.
OsDSS1	Cytochrome P450 superfamily protein|	HORVU4Hr1G084120	chr4H	627440022	627442145	y	Os03g0140300	Oryza sativa	NA	NA	NA	NA	NA	n	NA	n	NA	n	n	n	n	n	n	n	n	n	n	n	n	n	n	n	n	n	25800365	A cytochrome P450, OsDSS1, is involved in growth and drought stress responses in rice (Oryza sativa L.).
OsHsp17.0	16.9 kDa class I heat shock protein 1	HORVU3Hr1G006530	chr3H	15708139	15708947	y	LOC_Os01g04380.1	Oryza sativa	SCRI_RS_65533	syn.	chr3H	15708544	Within gene	n	NA	n	NA	n	n	n	n	n	n	n	n	n	n	n	n	n	n	n	n	n	22321692	Overexpression of OsHsp17.0 and OsHsp23.7 enhances drought and salt tolerance in rice
OsHSP17.7	17.9 kDa class I heat shock protein	HORVU4Hr1G060720	chr4H	509850028	509850516	y	LOC_Os03g16040.1	Oryza sativa	NA	NA	NA	NA	NA	n	NA	n	NA	n	n	n	n	n	n	n	n	n	n	n	n	n	n	n	n	n	17968552	Enhanced tolerance to drought stress in transgenic rice plants overexpressing a small heat-shock protein, sHSP17.7
OsHsp23.7	Heat shock 70 kDa protein 3	HORVU6Hr1G081460	chr6H	545779445	545783459	y	LOC_Os12g38180.1	Oryza sativa	11_20996	nonsyn.	chr6H	545781074	Within gene	n	NA	n	NA	n	n	n	n	n	n	n	n	n	n	n	n	n	n	n	n	n	22321692	Overexpression of OsHsp17.0 and OsHsp23.7 enhances drought and salt tolerance in rice
OsIAA6	Auxin-responsive protein IAA6	HORVU3Hr1G070620	chr3H	534070489	534073517	y	LOC_Os01g53880.1	Oryza sativa	11_10813	noncoding	chr3H	534070384	106bp downstream of gene	n	NA	n	NA	n	n	n	n	n	n	n	n	n	n	n	n	n	n	n	n	n	26025543	OsIAA6, a member of the rice Aux/IAA gene family, is involved in drought tolerance and tiller outgrowth
OsiSAP8	Zinc finger A20 and AN1 domain-containing stress-associated protein 9	HORVU2Hr1G053670	chr2H	328713964	328714708	y	BAS98607.1	Oryza sativa	NA	NA	NA	NA	NA	n	NA	n	NA	n	n	n	n	n	n	n	n	n	n	n	n	n	n	n	n	n	18205020	Overexpression of OsiSAP8, a member of stress associated protein (SAP) gene family of rice confers tolerance to salt, drought and cold stress in transgenic tobacco and rice
OsJAZ1	jasmonate-zim-domain protein 12	HORVU2Hr1G112360	chr2H	725648938	725655525	n	AK059441.1	Oryza sativa	11_10376	noncoding	chr2H	725655512	Within gene	n	NA	n	NA	n	n	n	n	n	n	n	n	n	n	n	n	n	n	n	n	n	21332845	OsbHLH148, a basic helix‐loop‐helix protein, interacts with OsJAZ proteins in a jasmonate signaling pathway leading to drought tolerance in rice
OsJAZ1	jasmonate-zim-domain protein 12	HORVU2Hr1G112360	chr2H	725648938	725655525	n	AK059441.1	Oryza sativa	SCRI_RS_171523	syn.	chr2H	725660189	4664 bp upstream of gene	n	NA	n	NA	n	n	n	n	n	n	n	n	n	n	n	n	n	n	n	n	n	21332845	OsbHLH148, a basic helix‐loop‐helix protein, interacts with OsJAZ proteins in a jasmonate signaling pathway leading to drought tolerance in rice
OsLEA3-1	Late embryogenesis abundant protein 76	HORVU1Hr1G056570	chr1H	415021596	415022795	n	AK063984.1	Oryza sativa	SCRI_RS_907	noncoding	chr1H	415015385	6212bp downstream of gene	n	NA	n	NA	n	n	n	n	n	n	n	n	n	n	n	n	n	n	n	n	n	17426956	Over-expression of a LEA gene in rice improves drought resistance under the field conditions
OsLEA3-2	Late embryogenesis abundant protein 1	HORVU4Hr1G051780	chr4H	427054657	427056142	n	LOC_Os03g20680.1	Oryza sativa	NA	NA	NA	NA	NA	n	NA	n	NA	n	n	n	n	n	n	n	n	n	n	n	n	n	n	n	n	n	23024799	OsLEA3-2, an Abiotic Stress Induced Gene of Rice Plays a Key Role in Salt and Drought Tolerance
OsMIOX	Inositol oxygenase 1	HORVU7Hr1G088260	chr7H	534545447	534548826	n	LOC_Os06g36560.1	Oryza sativa	NA	NA	NA	NA	NA	n	NA	n	NA	n	n	n	n	n	n	n	n	n	n	n	n	n	n	n	n	n	23017909	OsMIOX, a myo-inositol oxygenase gene, improves drought tolerance through scavenging of reactive oxygen species in rice (Oryza sativa L.)
OsMSR2	calmodulin-like 38	HORVU3Hr1G109230	chr3H	677377299	677378596	n	LOC_Os01g72530.1	Oryza sativa	NA	NA	NA	NA	NA	n	NA	n	NA	n	n	n	n	n	n	n	n	n	n	n	n	n	n	n	n	n	21359958	A novel rice calmodulin-like gene, OsMSR2, enhances drought and salt tolerance and increases ABA sensitivity in Arabidopsis
OsMT1a	Metallothionein-like protein 1	HORVU1Hr1G059590	chr1H	434062168	434062799	n	LOC_Os11g47809.1	Oryza sativa	NA	NA	NA	NA	NA	n	NA	n	NA	n	n	n	n	n	n	n	n	n	n	n	n	n	n	n	n	n	19229638	OsMT1a, a type 1 metallothionein, plays the pivotal role in zinc homeostasis and drought tolerance in rice
OsMYB3R-2	myb domain protein 3r-5	HORVU3Hr1G086270	chr3H	616465321	616471572	n	LOC_Os01g62410.1	Oryza sativa	NA	NA	NA	NA	NA	n	NA	n	NA	n	n	n	n	n	n	n	n	n	n	n	n	n	n	n	n	n	17293435	Overexpression of an R1R2R3 MYB Gene, OsMYB3R-2, Increases Tolerance to Freezing, Drought, and Salt Stress in Transgenic Arabidopsis
OsMYB48-1	myb domain protein 59	HORVU3Hr1G116740	chr3H	696284672	696286178	n	LOC_Os01g74410.1	Oryza sativa	NA	NA	NA	NA	NA	n	NA	n	NA	n	n	n	n	n	n	n	n	n	n	n	n	n	n	n	n	n	24667379	Overexpression of OsMYB48-1, a Novel MYB-Related Transcription Factor, Enhances Drought and Salinity Tolerance in Rice
OsNAC10	NAC domain protein	HORVU5Hr1G045650	chr5H	353125655	353127305	n	BAF27472.1	Oryza sativa	NA	NA	NA	NA	NA	n	NA	n	NA	n	n	n	n	n	n	n	n	n	n	n	n	n	n	n	n	n	20335401	Root-Specific Expression of OsNAC10 Improves Drought Tolerance and Grain Yield in Rice under Field Drought Conditions
OsNAC5	NAC domain protein	HORVU4Hr1G017430	chr4H	76589365	76591691	n	LOC_Os11g08210.1	Oryza sativa	11_21254	noncoding	chr4H	76591117	Within gene	n	NA	n	NA	n	n	n	n	n	n	n	n	n	n	n	n	n	n	n	n	n	23094910	OsNAC5 overexpression enlarges root diameter in rice plants leading to enhanced drought tolerance and increased grain yield in the field
OsNAC52	NAC domain protein	HORVU1Hr1G063740	chr1H	456852499	456854789	n	LOC_Os05g34830.1	Oryza sativa	11_10043	noncoding	chr1H	456852946	Within gene	n	NA	n	NA	n	n	y	n	y	n	n	n	n	n	y	n	n	n	n	n	n	10.1007/s11240-009-9640-9	OsNAC52, a rice NAC transcription factor, potentially responds to ABA and confers drought tolerance in transgenic plants
OsPYL/RCARs	Abscisic acid receptor PYR1	HORVU1Hr1G030390	chr1H	174189432	174192319	n	LOC_Os05g12260.1	Oryza sativa	NA	NA	NA	NA	NA	n	NA	n	NA	n	n	n	n	n	n	n	n	n	n	n	n	n	n	n	n	n	24474809	Overexpression of PYL5 in rice enhances drought tolerance, inhibits growth, and modulates gene expression
OsSIK1	Leucine-rich receptor-like protein kinase family protein	HORVU7Hr1G012920	chr7H	18662724	18669859	y	BAD44800.1	Oryza sativa	NA	NA	NA	NA	NA	n	NA	n	NA	n	n	n	n	n	n	n	n	n	n	n	n	n	n	n	n	n	20128882	Receptor‐like kinase OsSIK1 improves drought and salt stress tolerance in rice (Oryza sativa) plants
OsSNAC1	NAC domain protein	HORVU5Hr1G111590	chr5H	636772198	636774461	n	AK099245	Oryza sativa	NA	NA	NA	NA	NA	n	NA	n	NA	n	n	n	n	n	n	n	n	n	n	n	n	n	n	n	n	n	16924117	Overexpressing a NAM, ATAF, and CUC (NAC) transcription factor enhances drought resistance and salt tolerance in rice
OsWRKY11	WRKY DNA-binding protein 71	HORVU1Hr1G088300	chr1H	541485678	541488517	y	BK005014.1	Oryza sativa	NA	NA	NA	NA	NA	n	NA	n	NA	n	n	n	n	n	n	n	n	n	n	n	n	n	n	n	n	n	18818929	Enhanced heat and drought tolerance in transgenic rice seedlings overexpressing OsWRKY11 under the control of HSP101 promoter
OsWRKY30	WRKY DNA-binding protein 2	HORVU5Hr1G072020	chr5H	534720375	534726141	y	HM153428.1	Oryza sativa	SCRI_RS_212784	syn.	chr5H	534723802	Within gene	n	NA	n	NA	n	n	n	n	n	n	n	n	n	n	n	n	n	n	n	n	n	22875749	OsWRKY30 is activated by MAP kinases to confer drought tolerance in rice
OsWRKY45	WRKY DNA-binding protein 70	HORVU7Hr1G083270	chr7H	501968180	501970448	y	GQ331932.1	Oryza sativa	NA	NA	NA	NA	NA	n	NA	n	NA	n	n	n	n	n	n	n	n	n	n	n	n	n	n	n	n	n	https://doi.org/10.1016/j.envexpbot.2008.07.002	Over-expression of the stress-induced OsWRKY45 enhances disease resistance and drought tolerance in Arabidopsis
OsZFP252	zinc-finger protein 2	HORVU4Hr1G013460	chr4H	46972575	46974016	y	AY219847.1	Oryza sativa	NA	NA	NA	NA	NA	n	NA	n	NA	n	n	n	n	n	n	n	n	n	n	n	n	n	n	n	n	n	18325341	Overexpression of a TFIIIA‐type zinc finger protein gene ZFP252 enhances drought and salt tolerance in rice (Oryza sativa L.)
PeSCL7	less than 100 bp match	NA	NA	NA	NA	NA	KJ511863.1	Populus euphratica	NA	NA	NA	NA	NA	n	NA	n	NA	n	n	n	n	n	n	n	n	n	n	n	n	n	n	n	n	n	20616154	The salt- and drought-inducible poplar GRAS protein SCL7 confers salt and drought tolerance in Arabidopsis thaliana
PvNCED1	nine-cis-epoxycarotenoid dioxygenase 3	HORVU5Hr1G008050	chr5H	18037869	18039692	y	NM_112304	Phaseolus vulgaris	NA	NA	NA	NA	NA	n	NA	n	NA	n	n	n	n	n	n	n	n	n	n	n	n	n	n	n	n	n	11842158	Overexpression of a 9-cis-Epoxycarotenoid Dioxygenase Gene in Nicotiana plumbaginifolia Increases Abscisic Acid and Phaseic Acid Levels and Enhances Drought Tolerance
SaARF1	ADP-ribosylation factor 1	HORVU3Hr1G079700	chr3H	584539968	584542992	y	AB050957.1	Spartina alterniflora Loisel	NA	NA	NA	NA	NA	n	NA	n	NA	n	n	n	n	n	n	n	n	n	n	n	n	n	n	n	n	n	https://link.springer.com/article/10.1007%2Fs11240-013-0416-x	Ectopic expression of ADP ribosylation factor 1 (SaARF1) from smooth cordgrass (Spartina alterniflora Loisel) confers drought and salt tolerance in transgenic rice and Arabidopsis
SodERF3	Ethylene-responsive transcription factor 8	HORVU1Hr1G067110	chr1H	476364162	476366114	y	AM493723.1	Saccharum officinarum	11_10686	noncoding	chr1H	476365129	Within gene	n	NA	n	NA	n	y	n	n	y	n	y	n	n	y	n	n	n	n	y	n	n	18281696	SodERF3, a Novel Sugarcane Ethylene Responsive Factor (ERF), Enhances Salt and Drought Tolerance when Overexpressed in Tobacco Plants
TaAQP7	Aquaporin-like superfamily protein	HORVU2Hr1G089940	chr2H	640763977	640790201	y	HQ650109.1	Triticum aestivum	NA	NA	NA	NA	NA	n	NA	n	NA	n	n	n	n	n	n	n	n	n	n	n	n	n	n	n	n	n	23285044	Overexpression of the Wheat Aquaporin Gene, TaAQP7, Enhances Drought Tolerance in Transgenic Tobacco
TaASR1	Abscisic stress-ripening protein 1	HORVU4Hr1G020030	chr4H	97456113	97457293	y	HQ287799.1	Triticum aestivum	11_10093	noncoding	chr4H	97456342	Within gene	n	NA	n	NA	n	n	n	y	n	n	n	n	n	n	n	n	n	n	n	n	n	23356734	TaASR1, a transcription factor gene in wheat, confers drought stress tolerance in transgenic tobacco
TaASR1	Abscisic stress-ripening protein 1	HORVU4Hr1G020030	chr4H	97456113	97457293	y	HQ287799.1	Triticum aestivum	12_20156	syn.	chr4H	97457045	Within gene	n	NA	n	NA	n	n	n	n	n	n	n	n	n	n	n	n	n	n	n	n	n	23356734	TaASR1, a transcription factor gene in wheat, confers drought stress tolerance in transgenic tobacco
TaERA1	Protein farnesyltransferase subunit beta	HORVU3Hr1G070050	chr3H	530325159	530329231	y	DQ858293.1	Triticum aestivum	SCRI_RS_204491	nonsyn.	chr3H	530329100	Within gene	n	NA	n	NA	n	n	n	n	n	n	n	n	n	n	n	n	n	n	n	n	n	10.3835/plantgenome2013.04.0010	Association Mapping and Nucleotide Sequence Variation in Five Drought Tolerance Candidate Genes in Spring Wheat
TaERA1	Protein farnesyltransferase subunit beta	HORVU3Hr1G070050	chr3H	530325159	530329231	y	DQ858293.1	Triticum aestivum	SCRI_RS_200508	syn.	chr3H	530323891	1269bp downstream of gene	n	NA	n	NA	n	n	n	n	n	n	n	n	n	n	n	n	n	n	n	n	n	10.3835/plantgenome2013.04.0010	Association Mapping and Nucleotide Sequence Variation in Five Drought Tolerance Candidate Genes in Spring Wheat
TaERA1	Protein farnesyltransferase subunit beta	HORVU3Hr1G070050	chr3H	530325159	530329231	y	DQ858293.1	Triticum aestivum	12_31242	noncoding	chr3H	530321562	3598bp downstream of gene	n	NA	n	NA	n	n	n	n	n	n	n	n	n	n	n	n	n	n	n	n	n	10.3835/plantgenome2013.04.0010	Association Mapping and Nucleotide Sequence Variation in Five Drought Tolerance Candidate Genes in Spring Wheat
TaEXPA2	expansin B4	HORVU6Hr1G063180	chr6H	425269012	425270632	y	AY589584.1	Triticum aestivum	SCRI_RS_211289	syn.	chr6H	425269533	Within gene	y	IC1	n	NA	n	n	n	n	n	n	n	n	n	n	n	n	n	n	n	n	n	27073898	Overexpression of the Wheat Expansin Gene TaEXPA2Improved Seed Production and Drought Tolerance in Transgenic Tobacco Plants
TaLEA 3	Late embryogenesis abundant protein 76	HORVU1Hr1G079290	chr1H	522615650	522616400	y	AY148492	Triticum aestivum	SCRI_RS_230040	nonsyn.	chr1H	522615703	Within gene	n	NA	n	NA	n	n	n	n	n	n	n	n	n	n	n	n	n	n	n	n	n	18936880	Enhanced drought tolerance in transgenic Leymus chinensis plants with constitutively expressed wheat TaLEA 3
TaMYB33	myb domain protein 15	HORVU6Hr1G058580	chr6H	383454656	383455886	y	JN584645.1	Triticum aestivum	NA	NA	NA	NA	NA	n	NA	n	NA	n	n	n	n	n	n	n	n	n	n	n	n	n	n	n	n	n	22350156	Over-expression of TaMYB33 encoding a novel wheat MYB transcription factor increases salt and drought tolerance in Arabidopsis
TaNAC29	NAC domain protein	HORVU2Hr1G017470	chr2H	42672747	42676096	y	KT783450.1	Triticum aestivum	NA	NA	NA	NA	NA	n	NA	n	NA	n	n	n	n	n	n	n	n	n	n	n	n	n	n	n	n	n	26536863	TaNAC29, a NAC transcription factor from wheat, enhances salt and drought tolerance in transgenic Arabidopsis
TaSTRG	Salt tolerant-related protein	HORVU4Hr1G063430	chr4H	531361349	531362720	y	EF599631	Triticum aestivum	SCRI_RS_123385	noncoding	chr4H	531361521	Within gene	n	NA	n	NA	n	n	n	n	n	n	n	n	n	n	n	n	n	n	n	n	n	19481835	Overexpression of TaSTRG gene improves salt and drought tolerance in rice
TERF1	Ethylene-responsive transcription factor 1	HORVU6Hr1G062380	chr6H	417994395	417995987	y	NM_117855.6	Solanum lycopersicum	NA	NA	NA	NA	NA	n	NA	n	NA	n	n	n	n	n	n	n	n	n	n	n	n	n	n	n	n	n	18777179	Expression of TERF1 in rice regulates expression of stress-responsive genes and enhances tolerance to drought and high-salinity
TLD1/OsGH3.13	Putative indole-3-acetic acid-amido synthetase GH3.9	HORVU3Hr1G077360	chr3H	572642818	572645451	y	LOC_Os11g32520.1	Oryza sativa	NA	NA	NA	NA	NA	n	NA	n	NA	n	n	n	n	n	n	n	n	n	n	n	n	n	n	n	n	n	19776160	Altered Architecture and Enhanced Drought Tolerance in Rice via the Down-Regulation of Indole-3-Acetic Acid by TLD1/OsGH3.13 Activation
TsCBF1	Ethylene-responsive transcription factor 4	HORVU0Hr1G016540	chrUn	89030446	89031106	n	MLOC_75886.1	Thellungiella halophila	12_11321	syn.	chrUn	89030956	Within gene	n	NA	n	NA	n	n	n	n	n	n	n	n	n	n	n	n	n	n	n	n	n	https://doi.org/10.1007/s11032-009-9385-5	Over-expression of TsCBF1 gene confers improved drought tolerance in transgenic maize
Zm-Asr1	Abscisic stress-ripening protein 1	HORVU4Hr1G020030	chr4H	97456113	97457293	y	Y12330.1	Zea Mays	11_10093	noncoding	chr4H	97456342	Within gene	n	NA	n	NA	n	n	n	n	n	n	n	n	n	n	n	n	n	n	n	n	n	12595141	Improvement of drought tolerance in maize: towards the functional validation of the Zm-Asr1 gene and increase of water use efficiency by over-expressing C4–PEPC
Zm-Asr1	Abscisic stress-ripening protein 1	HORVU4Hr1G020030	chr4H	97456113	97457293	y	Y12330.1	Zea Mays	12_20156	syn.	chr4H	97457045	Within gene	n	NA	n	NA	n	n	n	n	n	n	n	n	n	n	n	n	n	n	n	n	n	12595141	Improvement of drought tolerance in maize: towards the functional validation of the Zm-Asr1 gene and increase of water use efficiency by over-expressing C4–PEPC
ZmbZIP72	bZIP transcription factor 27	HORVU5Hr1G068230	chr5H	516536711	516540658	n	HQ328839.1	Zea Mays	NA	NA	NA	NA	NA	n	NA	n	NA	n	n	n	n	n	n	n	n	n	n	n	n	n	n	n	n	n	21866346	Cloning and characterization of a maize bZIP transcription factor, ZmbZIP72, confers drought and salt tolerance in transgenic Arabidopsis
ZmNF-YB2	Nuclear transcription factor Y subunit B-3	HORVU2Hr1G032320	chr2H	124882874	124884558	y	NM_001112582.2	Zea Mays	NA	NA	NA	NA	NA	n	NA	n	NA	n	n	n	n	n	n	n	n	n	n	n	n	n	n	n	n	n	17923671	Plant nuclear factor Y (NF-Y) B subunits confer drought tolerance and lead to improved corn yields on water-limited acres
